# Supplementary material for: Characterization of the Bacterial Communities Inhabiting Tropical Propolis of Puerto Rico
Source: MDPI journal article supplement (doi:10.3390/microorganisms11051130), 2023-04-26
Supplement: s1 [file s1]

**Table S1.** Antimicrobial activity of alcoholic propolis extracts against tester bacterial strains. AMP= Ampicillin; TET = Tetracycline; #4dH<sub>2</sub>O = #4 aqueous extract; EtOH = 70% ethanol; dH<sub>2</sub>O = distilled water; - = no inhibition (growth); +/- = partial inhibition; += complete inhibition (no growth); nm = not made.

| Tested solutions    | Tester strains |                     |                    |                    |                  |
|---------------------|----------------|---------------------|--------------------|--------------------|------------------|
|                     | <i>E. coli</i> | <i>A. baumannii</i> | <i>B. subtilis</i> | <i>E. faecalis</i> | <i>S. aureus</i> |
| AMP                 | +/-            | +                   | ++                 | +                  | ++               |
| TET                 | +              | +/-                 | ++                 | +/-                | ++               |
| LUCIA               | Tq             | +/-                 | +/-                | +                  | +                |
|                     | 1:2            | nm                  | nm                 | +                  | -                |
|                     | 1:4            | nm                  | nm                 | +/-                | -                |
|                     | 1:8            | nm                  | nm                 | +/-                | -                |
| AKIRA               | +              | +/-                 | +                  | +                  | +/-              |
| CUQUITA             | +              | +                   | +                  | +                  | +                |
| DIABLA              | +              | +                   | +                  | +                  | +                |
| DUKE                | +/-            | +                   | +                  | +                  | +                |
| FLORENCIA           | +/-            | ++                  | +                  | +                  | +                |
| #1                  | +/-            | ++                  | ++                 | +                  | ++               |
| #2                  | +/-            | ++                  | +                  | +                  | ++               |
| #4                  | Tq             | +/-                 | +/-                | ++                 | ++               |
|                     | 1:2            | nm                  | nm                 | +                  | +/-              |
|                     | 1:4            | nm                  | nm                 | +                  | +/-              |
|                     | 1:8            | nm                  | nm                 | +                  | +/-              |
| #4 H <sub>2</sub> O | nm             | -                   | -                  | -                  | -                |
| #8                  | +/-            | ++                  | ++                 | +                  | ++               |
| #11                 | +/-            | ++                  | ++                 | +                  | ++               |
| #13                 | +              | +                   | +                  | +                  | +                |
| EtOH                | Tq             | +/-                 | +/-                | -                  | +/-              |
|                     | 1:2            | nm                  | nm                 | -                  | -                |
|                     | 1:4            | nm                  | nm                 | -                  | -                |
|                     | 1:8            | nm                  | nm                 | -                  | -                |
| dH <sub>2</sub> O   | -              | -                   | -                  | -                  | -                |

**Table S2.** Linear discriminant analysis (LDA) effect size (LEfSe) on bacterial communities inhabiting propolis samples from Yauco and Arroyo areas, with different dominant vegetation. NA = Not Available.

| Phylum           | Family              | Genus                                    | Dominant Vegetation | Area   | LDA   | p-value |
|------------------|---------------------|------------------------------------------|---------------------|--------|-------|---------|
| Proteobacteria   | Rhodocyclaceae      | Dechloromonas                            | Dry Forest          | Yauco  | 2,077 | 0,019   |
| Proteobacteria   | Enterobacteriaceae  | NA                                       | Dry Forest          | Yauco  | 2,053 | 0,019   |
| Proteobacteria   | Sphingomonadaceae   | NA                                       | Dry Forest          | Yauco  | 2,225 | 0,019   |
| Actinobacteriota | Pseudonocardiaceae  | Pseudonocardia                           | Dry Forest          | Yauco  | 2,057 | 0,019   |
| Proteobacteria   | Rhodocyclaceae      | Dechloromonas                            | Dry Forest          | Yauco  | 2,246 | 0,019   |
| Proteobacteria   | Rhodocyclaceae      | NA                                       | Dry Forest          | Yauco  | 2,056 | 0,034   |
| Proteobacteria   | Burkholderiaceae    | Burkholderia-Cab. Paraburkholderia       | Dry Forest          | Yauco  | 2,071 | 0,045   |
| Actinobacteriota | Pseudonocardiaceae  | Pseudonocardia                           | Dry Forest          | Yauco  | 2,881 | 0,045   |
| Proteobacteria   | Enterobacteriaceae  | NA                                       | Dry Forest          | Yauco  | 2,686 | 0,047   |
| Proteobacteria   | Burkholderiaceae    | Burkholderia-Cab. Paraburkholderia       | Dry Forest          | Yauco  | 3,591 | 0,047   |
| Proteobacteria   | Rhodocyclaceae      | Dechloromonas                            | Dry Forest          | Yauco  | 2,077 | 0,019   |
| Proteobacteria   | Rhizobiaceae        | NA                                       | Moist Forest        | Arroyo | 2,195 | 0,005   |
| Proteobacteria   | Xanthomonadaceae    | Pseudoxanthomonas                        | Moist Forest        | Arroyo | 2,814 | 0,007   |
| Actinobacteriota | Brevibacteriaceae   | NA                                       | Moist Forest        | Arroyo | 2,809 | 0,007   |
| Bacteroidota     | Sphingobacteriaceae | Sphingobacterium                         | Moist Forest        | Arroyo | 3,036 | 0,007   |
| Actinobacteriota | Brevibacteriaceae   | Brevibacterium                           | Moist Forest        | Arroyo | 2,809 | 0,007   |
| Proteobacteria   | NA                  | NA                                       | Moist Forest        | Arroyo | 3,294 | 0,009   |
| Bacteroidota     | Sphingobacteriaceae | NA                                       | Moist Forest        | Arroyo | 3,220 | 0,009   |
| Proteobacteria   | Enterobacteriaceae  | NA                                       | Moist Forest        | Arroyo | 3,199 | 0,009   |
| Proteobacteria   | Xanthomonadaceae    | NA                                       | Moist Forest        | Arroyo | 3,225 | 0,009   |
| Proteobacteria   | Sphingomonadaceae   | Sphingomonas                             | Moist Forest        | Arroyo | 2,427 | 0,019   |
| Proteobacteria   | Rickettsiaceae      | Ac37b                                    | Moist Forest        | Arroyo | 2,336 | 0,019   |
| Proteobacteria   | Rickettsiaceae      | Ac37b                                    | Moist Forest        | Arroyo | 2,336 | 0,019   |
| Proteobacteria   | Rhizobiaceae        | Allorhizobium-Neorhizobium-Pararhizobium | Moist Forest        | Arroyo | 2,516 | 0,026   |
| Proteobacteria   | Sphingomonadaceae   | Sphingobium                              | Moist Forest        | Arroyo | 2,108 | 0,026   |
| Proteobacteria   | Erwiniaceae         | NA                                       | Moist Forest        | Arroyo | 3,321 | 0,028   |
| Proteobacteria   | Xanthomonadaceae    | Stenotrophomonas                         | Moist Forest        | Arroyo | 2,956 | 0,028   |
| Proteobacteria   | Beijerinckiaceae    | 1174_901_12                              | Moist Forest        | Arroyo | 2,157 | 0,034   |
| Bacteroidota     | Weeksellaceae       | NA                                       | Moist Forest        | Arroyo | 2,662 | 0,047   |
| Bacteroidota     | Weeksellaceae       | Chryseobacterium                         | Moist Forest        | Arroyo | 2,651 | 0,047   |
| Proteobacteria   | Rhizobiaceae        | Allorhizobium-Neorhizobium-Pararhizobium | Moist Forest        | Arroyo | 2,695 | 0,047   |
| Bacteroidota     | Flavobacteriaceae   | NA                                       | Moist Forest        | Arroyo | 2,185 | 0,047   |
| Proteobacteria   | Pseudomonadaceae    | NA                                       | Moist Forest        | Arroyo | 3,074 | 0,047   |
